# Supplementary material for: Genetic Structure Analysis of a Collection of Tunisian Durum Wheat Germplasm
Source: MDPI journal article supplement (doi:10.3390/ijms20133362), 2019-07-09
Supplement: s1 [file s1]

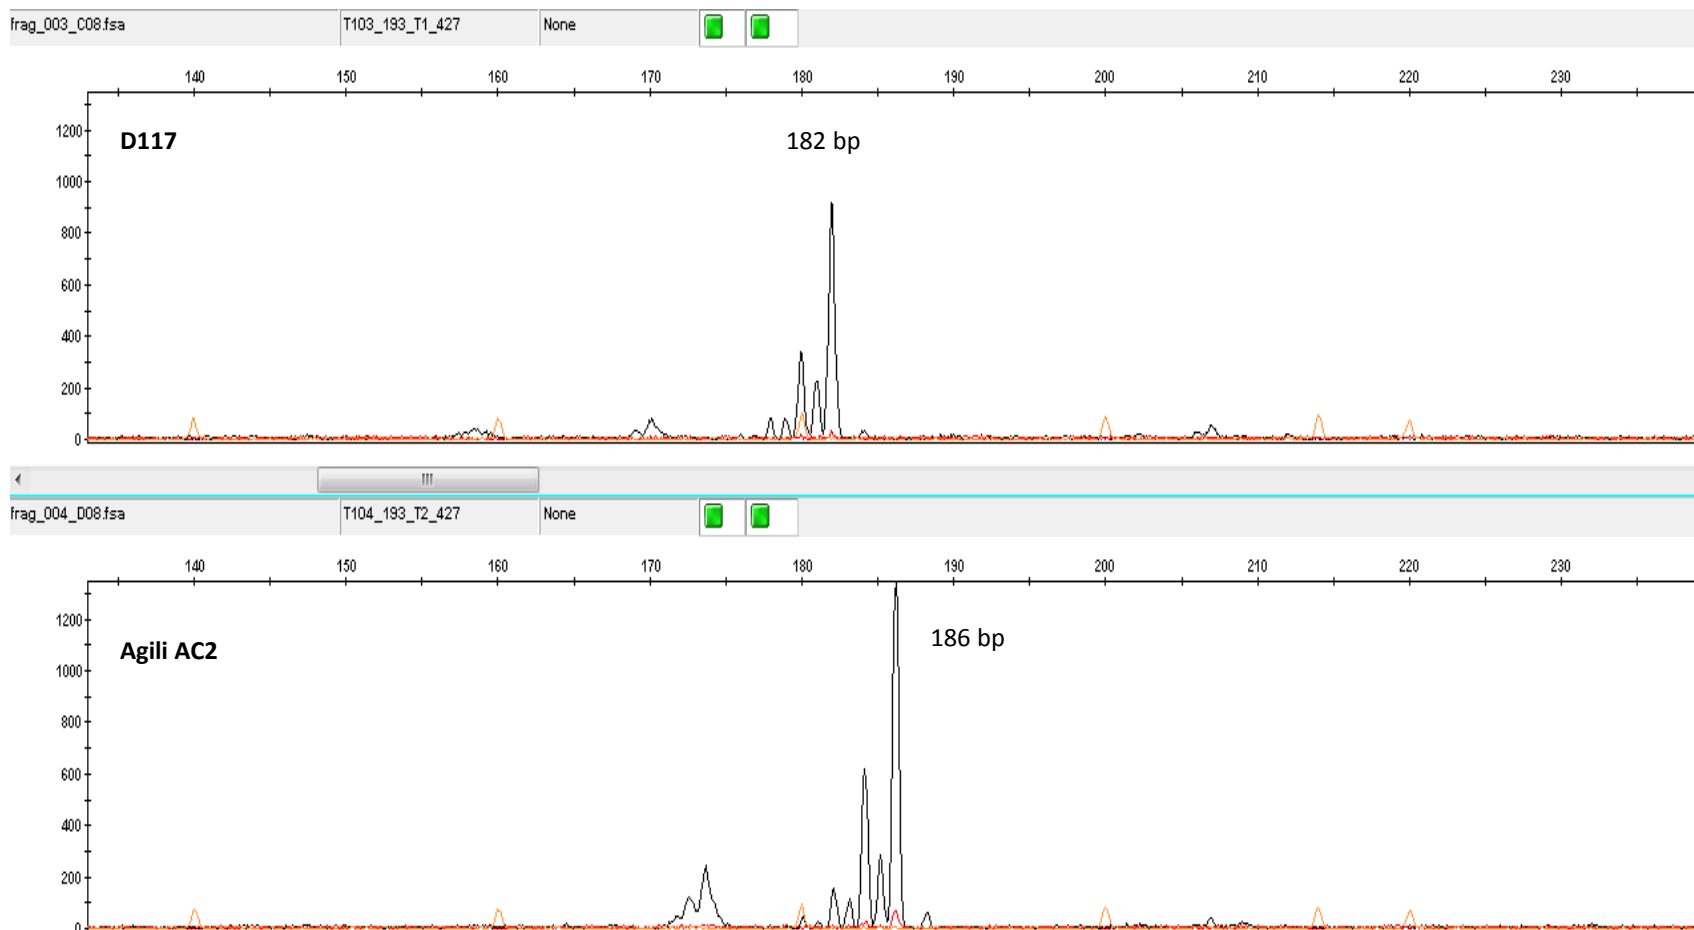

**Figure S3:** Electropherogram of Tunisian durum wheats D117 and Agili AC2 tested with *Xgwm193* SSR marker labeled with fluorescent dye NED. The alleles 182 and 186 bp were found in D117 and Agili AC2 durum samples, respectively.
