# Supplementary material for: Genetic Structure Analysis of a Collection of Tunisian Durum Wheat Germplasm
Source: MDPI journal article supplement (doi:10.3390/ijms20133362), 2019-07-09
Supplement: s1 [file s1]

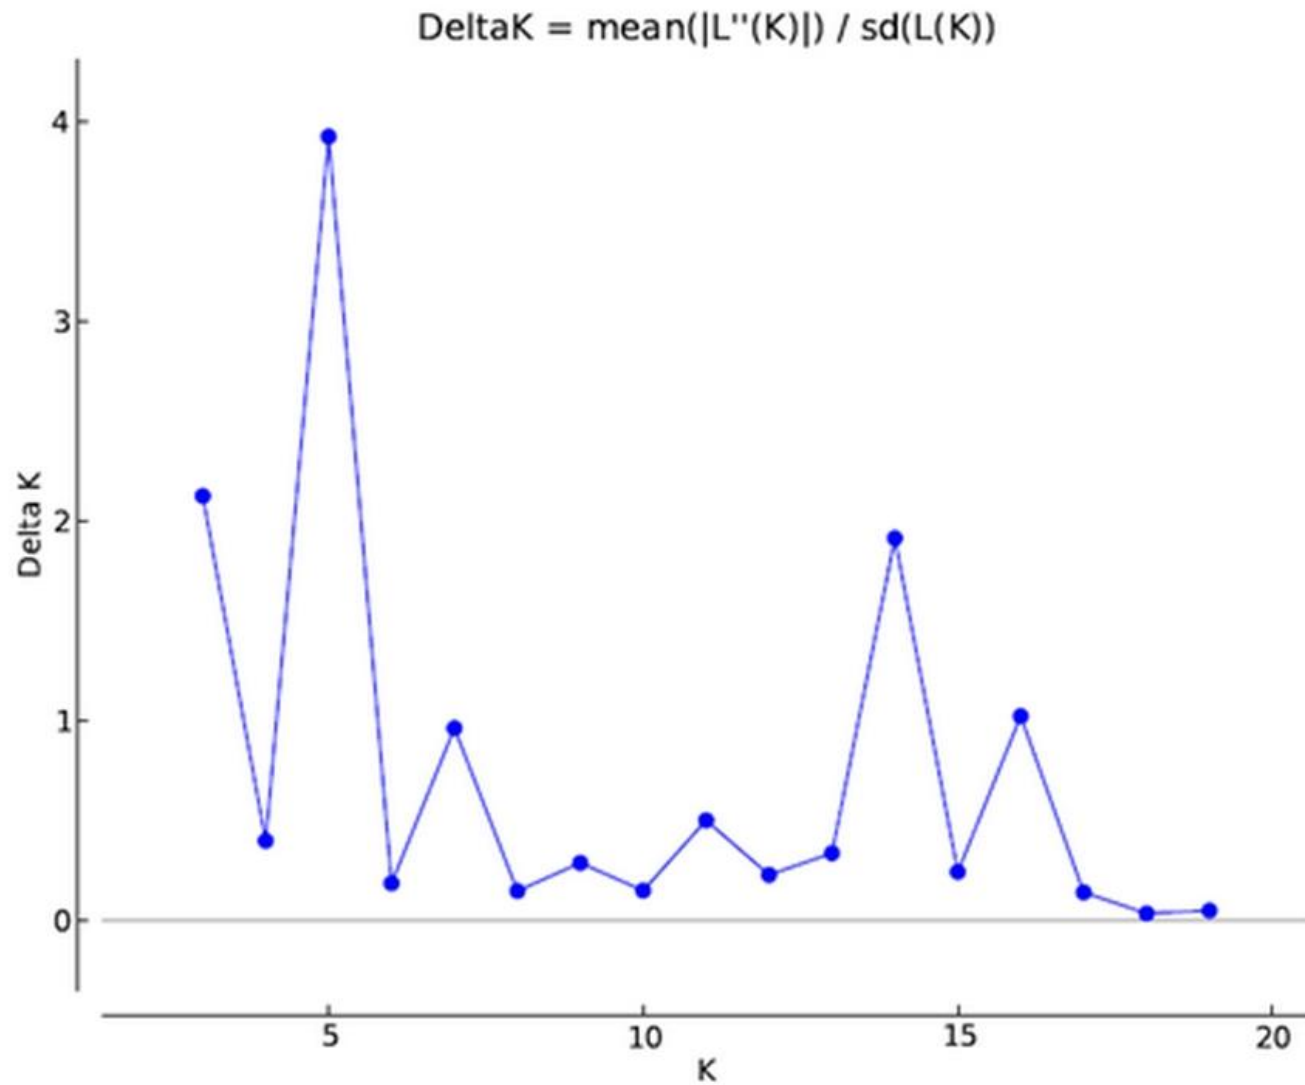

**Figure S2:** Delta  $\Delta K$  for differing numbers of subpopulations (K) estimated in durum wheat collection with 16 SSR markers.
