# Supplementary material for: Genetic Structure Analysis of a Collection of Tunisian Durum Wheat Germplasm
Source: MDPI journal article supplement (doi:10.3390/ijms20133362), 2019-07-09
Supplement: s1 [file s1]

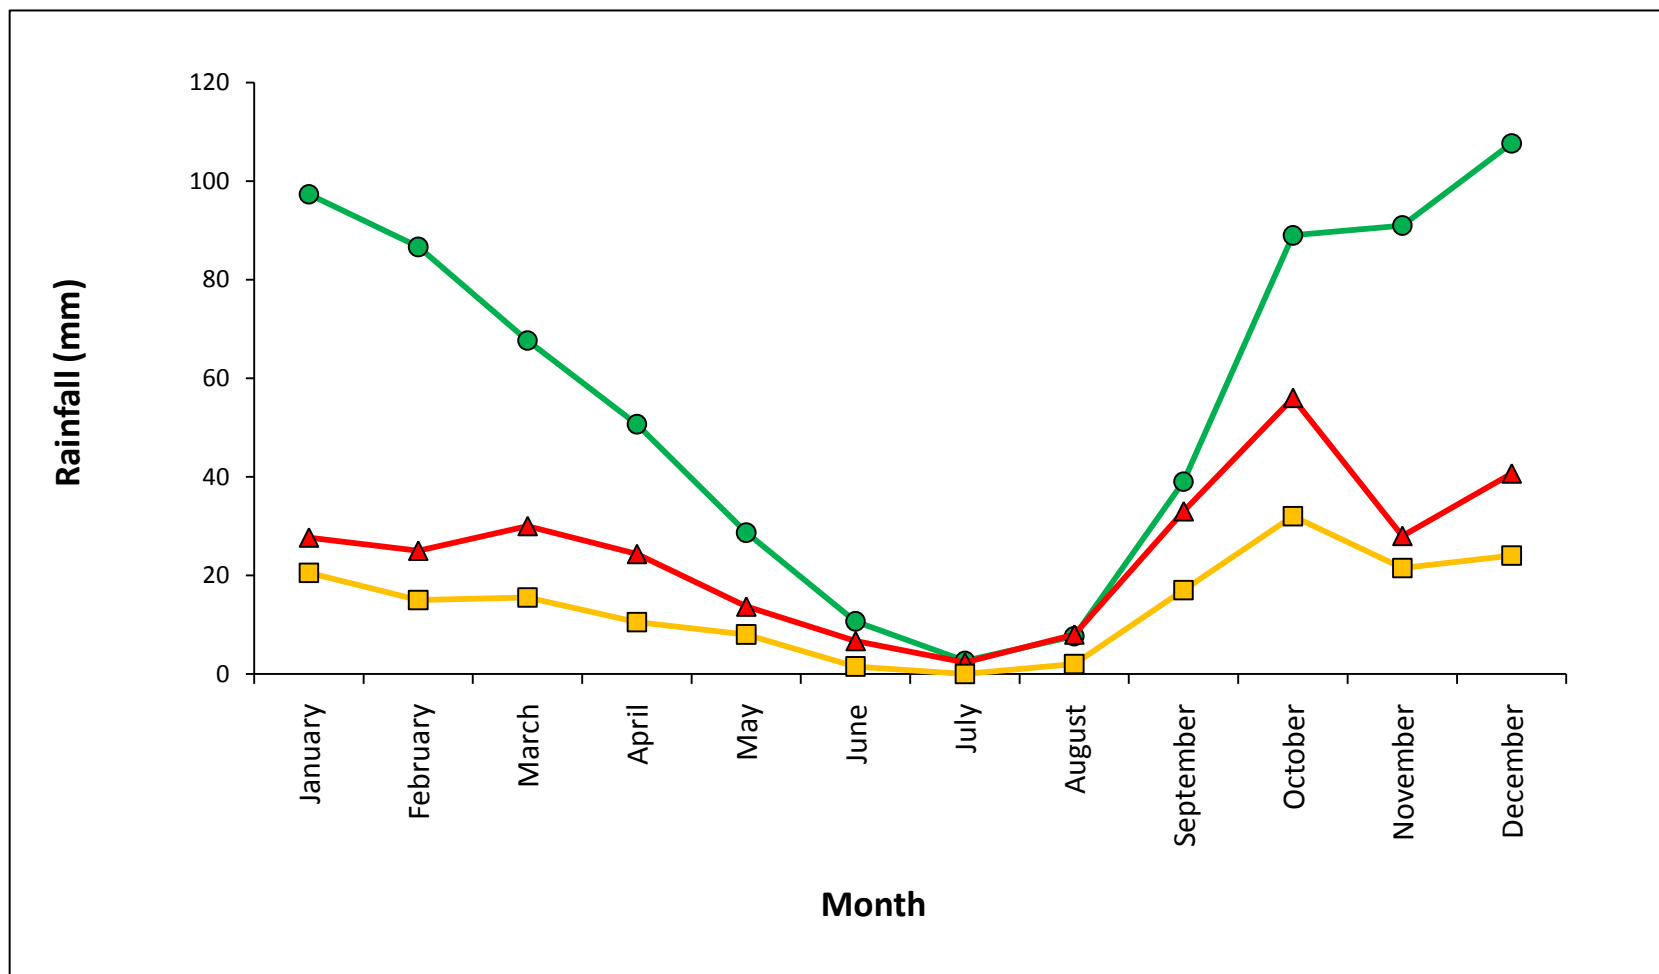

**Figure S1:** Monthly rainfall (mm) in the three Tunisian macro areas: North (in green), Center (in red) and South (in yellow).
