# Supplementary material for: Genetic Structure Analysis of a Collection of Tunisian Durum Wheat Germplasm
Source: MDPI journal article supplement (doi:10.3390/ijms20133362), 2019-07-09
Supplement: s1 [file s1]

**Table S1:** Analysis of molecular variance (AMOVA) of durum wheat collection split in three groups: Core Traditional Varieties (CTVs), entries named as traditional varieties by farmers and durum cultivars.

| Source of variation | df | SS     | MS    | Est. Var. | %   | <i>P</i> values |
|---------------------|----|--------|-------|-----------|-----|-----------------|
| Among groups        | 2  | 158.41 | 79.21 | 3.67      | 19  | <0.001          |
| Within groups       | 51 | 816.39 | 16.01 | 16.01     | 81  |                 |
| Total               | 53 | 974.80 |       | 19.68     | 100 |                 |

df = degree of freedom, SS=sum of squares, MS=mean squares, Est. var. = estimate of variance, % = percentage of total variation.
